# Supplementary material for: Wild bees and their nests host Paenibacillus bacteria with functional potential of avail
Source: PubMed Central journal article supplement (PMC6303958; doi:10.1186/s40168-018-0614-1), 2018-12-22

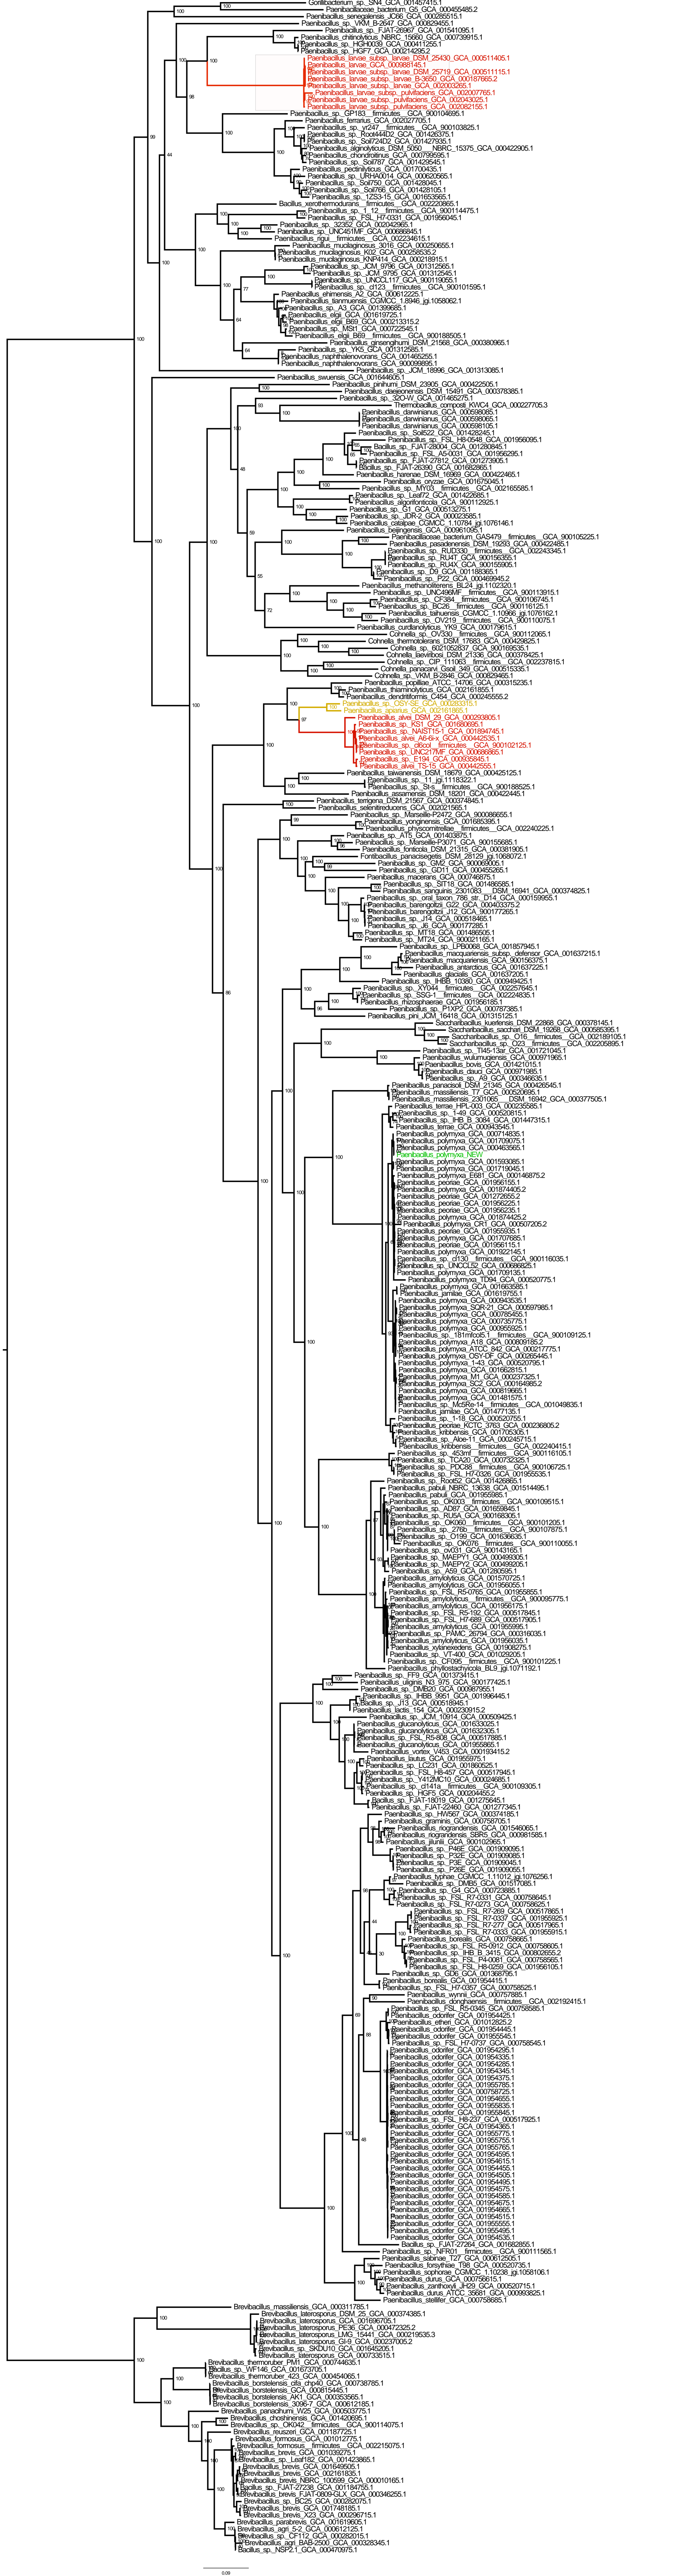

Supplement: 40168_2018_614_MOESM6_ESM.pdf [file 40168_2018_614_MOESM6_ESM.pdf]
